# Supplementary material for: Meta-Analysis and Machine Learning Models to Optimize the Efficiency of Self-Healing Capacity of Cementitious Material
Source: MDPI journal article supplement (doi:10.3390/ma14164437), 2021-08-08
Supplement: s1 [file s1]

# Meta-Analysis and Machine Learning Models to Optimize the Efficiency of Self-Healing Capacity of Cementitious Material

Shashank Gupta <sup>1,\*</sup>, Salam Al-Obaidi <sup>1,2</sup> and Liberato Ferrara <sup>1</sup>

## DATABASE AND VALIDATION DATASET –LIST OF SOURCES

The following 100 articles are used to carry out the meta-data and ANN analysis.

1. Abd, E.M. Self-Healing of Polymer Modified Concrete. 8.
2. Alghamri, R.; Al-Tabbaa, A. Self-Healing of Cracks in Mortars Using Novel PVA-Coated Pellets of Different Expansive Agents. *Construction and Building Materials* 2020, 254, 119254.
3. Araújo, M.; Van Tittelboom, K.; Dubruel, P.; Van Vlierberghe, S.; De Belie, N. Acrylate-Endcapped Polymer Precursors: Effect of Chemical Composition on the Healing Efficiency of Active Concrete Cracks. *Smart Materials and Structures* 2017, 26, 055031.
4. Azarsa, P.; Gupta, R.; Biparva, A. Assessment of Self-Healing and Durability Parameters of Concretes Incorporating Crystalline Admixtures and Portland Limestone Cement. *Cement and Concrete Composites* 2019, 99, 17–31.
5. Chindasiriphan, P.; Yokota, H.; Pimpakan, P. Effect of Fly Ash and Superabsorbent Polymer on Concrete Self-Healing Ability. *Construction and Building Materials* 2020, 233, 116975.
6. Darquennes, A.; Olivier, K.; Benboudjema, F.; Gagné, R. Self-Healing at Early-Age, a Way to Improve the Chloride Resistance of Blast-Furnace Slag Cementitious Materials. *Construction and Building Materials* 2016, 113, 1017–1028.
7. Deng, H.; Liao, G. Assessment of Influence of Self-Healing Behavior on Water Permeability and Mechanical Performance of ECC Incorporating Superabsorbent Polymer (SAP) Particles. *Construction and Building Materials* 2018, 170, 455–465.
8. Du, W.; Yu, J.; Gu, Y.; Li, Y.; Han, X.; Liu, Q. Preparation and Application of Microcapsules Containing Toluene-Diisocyanate for Self-Healing of Concrete. *Construction and Building Materials* 2019, 202, 762–769.
9. Feng, J.; Su, Y.; Qian, C. Coupled Effect of PP Fiber, PVA Fiber and Bacteria on Self-Healing Efficiency of Early-Age Cracks in Concrete. *Construction and Building Materials* 2019, 228, 116810.
10. Gao, S.; Jin, J.; Hu, G.; Qi, L. Experimental Investigation of the Interface Bond Properties between SHCC and Concrete under Sulfate Attack. *Construction and Building Materials* 2019, 217, 651–663.
11. Granger, S.; Loukili, A.; Pijaudier-Cabot, G.; Chanvillard, G. Experimental Characterization of the Self-Healing of Cracks in an Ultra High Performance Cementitious Material: Mechanical Tests and Acoustic Emission Analysis. *Cement and Concrete Research* 2007, 37, 519–527.
12. Gray, R.J. Autogenous Healing of Fibre/Matrix Interfacial Bond in Fibre-Reinforced Mortar. *Cement and Concrete Research* 1984, 14, 315–317.

13. Gupta, S.; Dai Pang, S.; Kua, H.W. Autonomous Healing in Concrete by Bio-Based Healing Agents—A Review. *Construction and Building Materials* 2017, 146, 419–428.
14. Guzlena, S.; Sakale, G. Self-Healing of Glass Fibre Reinforced Concrete (GRC) and Polymer Glass Fibre Reinforced Concrete (PGRC) Using Crystalline Admixtures. *Construction and Building Materials* 2021, 267, 120963.
15. He, H.; Zhu, Y.; Zhou, A. Electrochemical Impedance Spectroscopy (EIS) Used to Evaluate Influence of Different External Pressures, Curing Ages and Self-Healing Environments on the Self-Healing Behavior of Engineered Cementitious Composites (ECC). *Construction and Building Materials* 2018, 188, 153–160.
16. Homma, D.; Mihashi, H.; Nishiwaki, T. Self-Healing Capability of Fibre Reinforced Cementitious Composites. *Journal of Advanced Concrete Technology* 2009, 7, 217–228.
17. Hong, G.; Choi, S. Rapid Self-Sealing of Cracks in Cementitious Materials Incorporating Superabsorbent Polymers. *Construction and Building Materials* 2017, 143, 366–375.
18. Hung, C.-C.; Su, Y.-F. Medium-Term Self-Healing Evaluation of Engineered Cementitious Composites with Varying Amounts of Fly Ash and Exposure Durations. *Construction and Building Materials* 2016, 118, 194–203.
19. Hung, C.-C.; Su, Y.-F.; Hung, H.-H. Impact of Natural Weathering on Medium-Term Self-Healing Performance of Fiber Reinforced Cementitious Composites with Intrinsic Crack-Width Control Capability. *Cement and Concrete Composites* 2017, 80, 200–209.
20. In, C.-W.; Holland, R.B.; Kim, J.-Y.; Kurtis, K.E.; Kahn, L.F.; Jacobs, L.J. Monitoring and Evaluation of Self-Healing in Concrete Using Diffuse Ultrasound. *NDT & E International* 2013, 57, 36–44.
21. Jiang, Z.; Li, W.; Yuan, Z. Influence of Mineral Additives and Environmental Conditions on the Self-Healing Capabilities of Cementitious Materials. *Cement and Concrete Composites* 2015, 57, 116–127.
22. Jiang, Z.; Yuan, Z.; Li, W. Acoustic Emission Analysis of Characteristics of Healing Products in Steam-Cured Cementitious Materials with Mineral Additives. *Construction and Building Materials* 2019, 201, 807–817.
23. Kan, L.; Shi, H. Investigation of Self-Healing Behavior of Engineered Cementitious Composites (ECC) Materials. *Construction and Building Materials* 2012, 29, 348–356.
24. Khaliq, W.; Ehsan, M.B. Crack Healing in Concrete Using Various Bio Influenced Self-Healing Techniques. *Construction and Building Materials* 2016, 102, 349–357.
25. Kim, H.G.; Qudoos, A.; Ryou, J.-S. Self-Healing Performance of GGBFS Based Cementitious Mortar with Granulated Activators Exposed to a Seawater Environment. *Construction and Building Materials* 2018, 188, 569–582.
26. Kim, S.; Yoo, D.-Y.; Kim, M.-J.; Banthia, N. Self-Healing Capability of Ultra-High-Performance Fiber-Reinforced Concrete after Exposure to Cryogenic Temperature. *Cement and Concrete Composites* 2019, 104, 103335.
27. Kobayashi, K.; Suzuki, M.; Rokugo, K. The Effects of PE and PVA Fiber and Water Cement Ratio on Chloride Penetration and Rebar Corrosion Protection Performance of Cracked SHCC. *Construction and Building Materials* 2018, 178, 372–383.
28. Kwon, S.; Nishiwaki, T.; Kikuta, T.; Mihashi, H. Experimental Study on Self-Healing Capability of Cracked Ultra-High-Performance Hybrid-Fiber-Reinforced Cementitious Composites. In *Proceedings of the 3rd International Conference on Sustainable Construction Materials and Technologies*, Kyoto, Japan; 2013.

29. Lee, H.X.D.; Wong, H.S.; Buenfeld, N.R. Self-Sealing of Cracks in Concrete Using Superabsorbent Polymers. *Cement and Concrete Research* 2016, 15.
30. Lee, H.X.D.; Wong, H.S.; Buenfeld, N.R. Potential of Superabsorbent Polymer for Self-Sealing Cracks in Concrete. 8.
31. Li, G.; Liu, S.; Niu, M.; Liu, Q.; Yang, X.; Deng, M. Effect of Granulated Blast Furnace Slag on the Self-Healing Capability of Mortar Incorporating Crystalline Admixture. *Construction and Building Materials* 2020, 239, 117818.
32. Litina, C.; Al-Tabbaa, A. First Generation Microcapsule-Based Self-Healing Cementitious Construction Repair Materials. *Construction and Building Materials* 2020, 255, 119389.
33. Liu, H. Effects of External Multi-Ions and Wet-Dry Cycles in a Marine Environment on Autogenous Self-Healing of Cracks in Cement Paste. *Cement and Concrete Research* 2019, 9.
34. Liu, H. Promotion on Self-Healing of Cracked Cement Paste by Triethanolamine in a Marine Environment. *Construction and Building Materials* 2020, 10.
35. Liu, H. Self-Healing of Microcracks in Engineered Cementitious Composites under Sulfate and Chloride Environment. *Construction and Building Materials* 2017, 9.
36. Ma, H. Effect of Self-Healing on Water Permeability and Mechanical Property of Medium-Early-Strength Engineered Cementitious Composites. *Construction and Building Materials* 2014, 10.
37. Maes, M. Chloride Penetration in Cracked Mortar and the Influence of Autogenous Crack Healing. *Construction and Building Materials* 2016, 11.
38. Medjigbodo, S.; Bendimerad, A.Z.; Rozière, E.; Loukili, A. How Do Recycled Concrete Aggregates Modify the Shrinkage and Self-Healing Properties? *Cement and Concrete Composites* 2018, 86, 72–86.
39. Mehdipour, I. Feasibility of Using Near-Field Microwave Reflectometry for Monitoring Autogenous Crack Healing in Cementitious Materials. *Cement and Concrete Composites* 2018, 13.
40. Mircea, A.C.; Szilagyi, H.; Hegyi, A.; Baera, C. Study of Self-Healing Engineered Cementitious Composites for Durable and Sustainable Infrastructure. *Procedia Manufacturing* 2020, 46, 871–878, doi:10.1016/j.promfg.2020.05.002.
41. Mu, S.; Schutter, G.D.; Ma, B. Non-Steady State Chloride Diffusion in Concrete with Different Crack Densities. *Materials and Structures* 2013, 11.
42. Nasim, M. Effect of Crystalline Admixture, Fly Ash, and PVA Fiber on Self-Healing Capacity of Concrete. *Materials Today* 2020, 6.
43. Nguy, H.H. Self-Healing Properties of Cement-Based and Alkali-Activated Slag-Based Fiber-Reinforced Composites. *Construction and Building Materials* 2018, 11.
44. Nguyễn, H.H. Autogenous Healing of High Strength Engineered Cementitious Composites (ECC) Using Calcium-Containing Binders. *Construction and Building Materials* 2020, 16.
45. Nishiwaki, T.; Koda, M. Experimental Study on Self-Healing Capability of FRCC Using Different Types of Synthetic Fibers. 2012, 10, 13.
46. Palin, D.; Jonkers, H.M.; Wiktor, V. Autogenous Healing of Sea-Water Exposed Mortar: Quantification through a Simple and Rapid Permeability Test. *Cement and Concrete Research* 2016, 7.

47. Park, B. Quantitative Evaluation of Crack Self-Healing in Cement-Based Materials by Absorption Test. *Construction and Building Materials* 2018, 10.
48. Park, B. Self-Healing Capability of Cementitious Materials with Crystalline Admixtures and Super Absorbent Polymers (SAPs). *Construction and Building Materials* 2018, 13.
49. Qian, S.; Zhou, J. Self-Healing Behavior of Strain Hardening Cementitious Composites Incorporating Local Waste Materials. 2009, 9.
50. Qiu, J.; He, S.; Yang, E.-H. Polymeric Fiber and Hydraulic Cement Matrix. *Cement and Concrete Research* 2019, 9.
51. Qiu, J. Autogenous Healing of Fiber-Reinforced Reactive Magnesia-Based Tensile Strain-Hardening Composites. *Cement and Concrete Research* 2019, 13.
52. Qiu, J. Coupled Effects of Crack Width, Slag Content, and Conditioning Alkalinity on Autogenous Healing of Engineered Cementitious Composites. *Cement and Concrete Composites* 2016, 10.
53. Rajasegar, M. Hybrid Effect of Poly Vinyl Alcohol, Expansive Minerals, Nano-Silica and Rice Husk Ash on the Self-Healing Ability of Concrete. *Materials Today* 2021, 9.
54. Rauf, M. Comparative Performance of Different Bacteria Immobilized in Natural Fibers for Self-Healing in Concrete. *Construction and Building Materials* 2020, 13.
55. Reddy, C.M.K. Effect of Crystalline Admixtures, Polymers and Fibers on Self Healing Concrete - a Review. *Materials Today* 2020, 8.
56. Reddy, T.C.S. Macro Mechanical Properties of Self Healing Concrete with Crystalline Admixture under Different Environments. *Ain Shams Engineering Journal* 2019, 10.
57. Reinhardt, H.-W.; Jooss, M. Permeability and Self-Healing of Cracked Concrete as a Function of Temperature and Crack Width. *Cement and concrete research* 2003, 33, 981–985.
58. Roig-Flores, M. Effect of Crystalline Admixtures on the Self-Healing Capability of Early-Age Concrete Studied by Means of Permeability and Crack Closing Tests. *Construction and Building Materials* 2016, 11.
59. Roig-Flores, M. Self-Healing Capability of Concrete with Crystalline Admixtures in Different Environments. *Construction and Building Materials* 2015, 11.
60. Ruan, S. Influence of Crack Width on the Stiffness Recovery and Self-Healing of Reactive Magnesia-Based Binders under CO<sub>2</sub>-H<sub>2</sub>O Conditioning. *Construction and Building Materials* 2021, 13.
61. Beshr, B.S.S. Feasibility Assessment on Self-Healing Ability of Cementitious Composites with MgO. *Journal of Building Engineering* 2021, 8.
62. Shao-feng, Z. Experimental Determination Of Chloride Penetration In Cracked Concrete Beams. 5.
63. Siad, H. Influence of Limestone Powder on Mechanical, Physical and Self-Healing Behavior of Engineered Cementitious Composites. *Construction and Building Materials* 2015, 10.
64. Sidiq, A. Microstructural Analysis of Healing Efficiency in Highly Durable Concrete. *Construction and Building Materials* 2019, 15.

65. Singh, H. Influence of Cellulose Fiber Addition on Self-Healing and Water Permeability of Concrete. *Case Studies in Construction Materials* 2020, 15.
66. Sisomphon, K. Self-Healing of Surface Cracks in Mortars with Expansive Additive and Crystalline Additive. 2012, 9.
67. Snoeck, D.; Van Tittelboom, K.; Steuperaert, S.; Dubruel, P.; De Belie, N. Self-Healing Cementitious Materials by the Combination of Microfibres and Superabsorbent Polymers. *Journal of Intelligent Material Systems and Structures* 2014, 25, 13–24.
68. Snoeck, D. Mechanical and Self-Healing Properties of Cementitious Composites Reinforced with Flax and Cottonised Flax, and Compared with Polyvinyl Alcohol Fibres. *b i o s y s t e m e n g i n e e r i n g* 11.
69. Snoeck, D. Improved Multiple Cracking and Autogenous Healing in Cementitious Materials by Means of Chemically-Treated Natural Fibres. *b i o s y s t e m e n g i n e e r i n g* 13.
70. Song, X.F.; Wei, J.F.; He, T.S. A Method to Repair Concrete Leakage through Cracks by Synthesizing Super-Absorbent Resin in Situ. *Construction and Building Materials* 2009, 6.
71. Su, Y.-F. Autogenous Healing Performance of Internal Curing Agent-Based Self-Healing Cementitious Composite. *Cement and Concrete Composites* 2020, 8.
72. Suleiman, A.R. Effect of Environmental Exposure on Autogenous Self-Healing of Cracked Cement-Based Materials. *Cement and Concrete Research* 2018, 12.
73. Tomczak, K.; Jakubowski, J. The Effects of Age, Cement Content, and Healing Time on the Self-Healing Ability of High-Strength Concrete. *Construction and Building Materials* 2018, 187, 149–159, doi:10.1016/j.conbuildmat.2018.07.176.
74. Tziviloglou, E.; Wiktor, V.; Jonkers, H.M.; Schlangen, E. Bacteria-Based Self-Healing Concrete to Increase Liquid Tightness of Cracks. *Construction and Building Materials* 2016, 122, 118–125, doi:10.1016/j.conbuildmat.2016.06.080.
75. Van Tittelboom, K.; De Belie, N.; Van Loo, D.; Jacobs, P. Self-Healing Efficiency of Cementitious Materials Containing Tubular Capsules Filled with Healing Agent. *Cement and Concrete Composites* 2011, 33, 497–505, doi:10.1016/j.cemconcomp.2011.01.004.
76. Van Tittelboom, K.; Wang, J.; Araújo, M.; Snoeck, D.; Gruyaert, E.; Debbaut, B.; Derluyn, H.; Cnudde, V.; Tsangouri, E.; Van Hemelrijck, D.; et al. Comparison of Different Approaches for Self-Healing Concrete in a Large-Scale Lab Test. *Construction and Building Materials* 2016, 107, 125–137, doi:10.1016/j.conbuildmat.2015.12.186.
77. Wang, R.; Yu, J.; Gu, S.; He, P.; Han, X.; Liu, Q. Investigation of Self-Healing Capability on Surface and Internal Cracks of Cement Mortar with Ion Chelator. *Construction and Building Materials* 2020, 236, 117598, doi:10.1016/j.conbuildmat.2019.117598.
78. Wang, W.; Liu, J.; Agostini, F.; Davy, C.A.; Skoczylas, F.; Corvez, D. Durability of an Ultra High Performance Fiber Reinforced Concrete (UHPFRC) under Progressive Aging. *Cement and Concrete Research* 2014, 55, 1–13, doi:10.1016/j.cemconres.2013.09.008.
79. Wang, X.; Huang, Y.; Huang, Y.; Zhang, J.; Fang, C.; Yu, K.; Chen, Q.; Li, T.; Han, R.; Yang, Z.; et al. Laboratory and Field Study on the Performance of Microcapsule-Based Self-Healing Concrete in Tunnel Engineering. *Construction and Building Materials* 2019, 220, 90–101, doi:10.1016/j.conbuildmat.2019.06.017.

80. Wiktor, V.; Jonkers, H.M. Quantification of Crack-Healing in Novel Bacteria-Based Self-Healing Concrete. *Cement and Concrete Composites* 2011, 33, 763–770, doi:10.1016/j.cemconcomp.2011.03.012.
81. Win, P.P.; Watanabe, M.; Machida, A. Penetration Profile of Chloride Ion in Cracked Reinforced Concrete. *Cement and Concrete Research* 2004, 34, 1073–1079, doi:10.1016/j.cemconres.2003.11.020.
82. Wu, M.; Hu, X.; Zhang, Q.; Cheng, W.; Xue, D.; Zhao, Y. Application of Bacterial Spores Coated by a Green Inorganic Cementitious Material for the Self-Healing of Concrete Cracks. *Cement and Concrete Composites* 2020, 113, 103718, doi:10.1016/j.cemconcomp.2020.103718.
83. Xu, J.; Wang, X. Self-Healing of Concrete Cracks by Use of Bacteria-Containing Low Alkali Cementitious Material. *Construction and Building Materials* 2018, 167, 1–14, doi:10.1016/j.conbuildmat.2018.02.020.
84. Xue, C.; Li, W.; Qu, F.; Sun, Z.; Shah, S.P. Self-Healing Efficiency and Crack Closure of Smart Cementitious Composite with Crystalline Admixture and Structural Polyurethane. *Construction and Building Materials* 2020, 260, 119955, doi:10.1016/j.conbuildmat.2020.119955.
85. Xue, C.; Li, W.; Luo, Z.; Wang, K.; Castel, A. Effect of Chloride Ingress on Self-Healing Recovery of Smart Cementitious Composite Incorporating Crystalline Admixture and MgO Expansive Agent. *Cement and Concrete Research* 2021, 139, 106252, doi:10.1016/j.cemconres.2020.106252.
86. Yang, Y.; Lepech, M.D.; Yang, E.-H.; Li, V.C. Autogenous Healing of Engineered Cementitious Composites under Wet–Dry Cycles. *Cement and Concrete Research* 2009, 39, 382–390, doi:10.1016/j.cemconres.2009.01.013.
87. Yang, Y.; Yang, E.-H.; Li, V.C. Autogenous Healing of Engineered Cementitious Composites at Early Age. *Cement and Concrete Research* 2011, 41, 176–183, doi:10.1016/j.cemconres.2010.11.002.
88. Yang, Z.; Hollar, J.; He, X.; Shi, X. Laboratory Assessment of a Self-Healing Cementitious Composite. *Transportation Research Record* 9.
89. Ye, H.; Jin, N.; Jin, X.; Fu, C. Model of Chloride Penetration into Cracked Concrete Subject to Drying–Wetting Cycles. *Construction and Building Materials* 2012, 36, 259–269, doi:10.1016/j.conbuildmat.2012.05.027.
90. Yıldırım, G.; Khiavi, A.H.; Yeşilmen, S.; Şahmaran, M. Self-Healing Performance of Aged Cementitious Composites. *Cement and Concrete Composites* 2018, 87, 172–186, doi:10.1016/j.cemconcomp.2018.01.004.
91. Yildirim, G.; Aras, G.H.; Banyhussan, Q.S.; Şahmaran, M.; Lachemi, M. Estimating the Self-Healing Capability of Cementitious Composites through Non-Destructive Electrical-Based Monitoring. *NDT & E International* 2015, 76, 26–37, doi:10.1016/j.ndteint.2015.08.005.
92. Yildirim, G.; Sahmaran, M.; Balcikanli, M.; Ozbay, E.; Lachemi, M. Influence of Cracking and Healing on the Gas Permeability of Cementitious Composites. *Construction and Building Materials* 2015, 85, 217–226, doi:10.1016/j.conbuildmat.2015.02.095.
93. Zha, Y.; Yu, J.; Wang, R.; He, P.; Cao, Z. Effect of Ion Chelating Agent on Self-Healing Performance of Cement-Based Materials. *Construction and Building Materials* 2018, 190, 308–316, doi:10.1016/j.conbuildmat.2018.09.115.
94. Zhang, L.V.; Suleiman, A.R.; Nehdi, M.L. Self-Healing in Fiber-Reinforced Alkali-Activated Slag Composites Incorporating Different Additives. *Construction and Building Materials* 2020, 262, 120059, doi:10.1016/j.conbuildmat.2020.120059.

95. Zhang, P.; Dai, Y.; Ding, X.; Zhou, C.; Xue, X.; Zhao, T. Self-Healing Behaviour of Multiple Microcracks of Strain Hardening Cementitious Composites (SHCC). *Construction and Building Materials* 2018, 169, 705–715, doi:10.1016/j.conbuildmat.2018.03.032.
96. Zhang, Z.; Zhang, Q. Self-Healing Ability of Engineered Cementitious Composites (ECC) under Different Exposure Environments. *Construction and Building Materials* 2017, 156, 142–151, doi:10.1016/j.conbuildmat.2017.08.166.
97. Zhang, Z.; Qian, S.; Ma, H. Investigating Mechanical Properties and Self-Healing Behavior of Micro-Cracked ECC with Different Volume of Fly Ash. *Construction and Building Materials* 2014, 52, 17–23, doi:10.1016/j.conbuildmat.2013.11.001.
98. Zhao, G.; Li, J.; Shi, M.; Cui, J.; Xie, F. Degradation of Cast-in-Situ Concrete Subjected to Sulphate-Chloride Combined Attack. *Construction and Building Materials* 2020, 241, 117995, doi:10.1016/j.conbuildmat.2019.117995.
99. Zhong, W.; Yao, W. Influence of Damage Degree on Self-Healing of Concrete. *Construction and Building Materials* 2008, 22, 1137–1142, doi:10.1016/j.conbuildmat.2007.02.006.
100. Zhu, H.; Zhang, D.; Wang, T.; Wu, H.; Li, V.C. Mechanical and Self-Healing Behavior of Low Carbon Engineered Cementitious Composites Reinforced with PP-Fibers. *Construction and Building Materials* 2020, 259, 119805, doi:10.1016/j.conbuildmat.2020.119805.

The additional 136 articles that are not used due to restraints of required data in this study. However, with more additional scope of parameters, they can be used in future studies.

1. Akhavan, A.; Shafaatian, S.-M.-H.; Rajabipour, F. Quantifying the Effects of Crack Width, Tortuosity, and Roughness on Water Permeability of Cracked Mortars. *Cement and Concrete Research* 2012, 42, 313–320, doi:10.1016/j.cemconres.2011.10.002.
2. Al-Ansari, M.; Abu-Taqa, A.G.; Hassan, M.M.; Senouci, A.; Milla, J. Performance of Modified Self-Healing Concrete with Calcium Nitrate Microencapsulation. *Construction and Building Materials* 2017, 149, 525–534, doi:10.1016/j.conbuildmat.2017.05.152.
3. Alazhari, M.; Sharma, T.; Heath, A.; Cooper, R.; Paine, K. Application of Expanded Perlite Encapsulated Bacteria and Growth Media for Self-Healing Concrete. *Construction and Building Materials* 2018, 160, 610–619, doi:10.1016/j.conbuildmat.2017.11.086.
4. Algaifi, H.A.; Bakar, S.A.; Sam, A.R.Mohd.; Abidin, A.R.Z.; Shahir, S.; AL-Towayti, W.A.H. Numerical Modeling for Crack Self-Healing Concrete by Microbial Calcium Carbonate. *Construction and Building Materials* 2018, 189, 816–824, doi:10.1016/j.conbuildmat.2018.08.218.
5. Alghamri, R.; Kanellopoulos, A.; Al-Tabbaa, A. Impregnation and Encapsulation of Lightweight Aggregates for Self-Healing Concrete. *Construction and Building Materials* 2016, 124, 910–921, doi:10.1016/j.conbuildmat.2016.07.143.
6. Alghamri, R.; Kanellopoulos, A.; Litina, C.; Al-Tabbaa, A. Preparation and Polymeric Encapsulation of Powder Mineral Pellets for Self-Healing Cement Based Materials. *Construction and Building Materials* 2018, 186, 247–262, doi:10.1016/j.conbuildmat.2018.07.128.
7. Aliko-Benítez, A.; Doblaré, M.; Sanz-Herrera, J.A. Chemical-Diffusive Modeling of the Self-Healing Behavior in Concrete. *International Journal of Solids and Structures* 2015, 69–70, 392–402, doi:10.1016/j.ijsolstr.2015.05.011.
8. Al-Salloum, Y.; Hadi, S.; Abbas, H.; Almusallam, T.; Moslem, M.A. Bio-Induction and Bioremediation of Cementitious Composites Using Microbial Mineral Precipitation – A Review. *Construction and Building Materials* 2017, 154, 857–876, doi:10.1016/j.conbuildmat.2017.07.203.

9. Bentur, A.; Mitchell, D. Material Performance Lessons. *Cement and Concrete Research* 2008, 38, 259–272, doi:10.1016/j.cemconres.2007.09.009.
10. Berrocal, C.G.; Lundgren, K.; Löfgren, I. Corrosion of Steel Bars Embedded in Fibre Reinforced Concrete under Chloride Attack: State of the Art. *Cement and Concrete Research* 2016, 80, 69–85, doi:10.1016/j.cemconres.2015.10.006.
11. Bhaskar, S.; Anwar Hossain, K.M.; Lachemi, M.; Wolfaardt, G.; Otini Kroukamp, M. Effect of Self-Healing on Strength and Durability of Zeolite-Immobilized Bacterial Cementitious Mortar Composites. *Cement and Concrete Composites* 2017, 82, 23–33, doi:10.1016/j.cemconcomp.2017.05.013.
12. Boulay, C.; Dal Pont, S.; Belin, P. Real-Time Evolution of Electrical Resistance in Cracking Concrete. *Cement and Concrete Research* 2009, 39, 825–831, doi:10.1016/j.cemconres.2009.06.003.
13. Byoungsun, P.; Young, C.C. Investigating a New Method to Assess the Self-Healing Performance of Hardened Cement Pastes Containing Supplementary Cementitious Materials and Crystalline Admixtures. *Journal of Materials Research and Technology* 2019, 8, 6058–6073, doi:10.1016/j.jmrt.2019.09.080.
14. Caggiano, A.; Etse, G.; Ferrara, L.; Krelani, V. Zero-Thickness Interface Constitutive Theory for Concrete Self-Healing Effects. *Computers & Structures* 2017, 186, 22–34, doi:10.1016/j.compstruc.2017.02.005.
15. Chandra Sekhara Reddy, T.; Ravitheja, A. Macro Mechanical Properties of Self Healing Concrete with Crystalline Admixture under Different Environments. *Ain Shams Engineering Journal* 2019, 10, 23–32, doi:10.1016/j.asej.2018.01.005.
16. Charron, J.-P.; Denarié, E.; Brühwiler, E. Transport Properties of Water and Glycol in an Ultra High Performance Fiber Reinforced Concrete (UHPFRC) under High Tensile Deformation. *Cement and Concrete Research* 2008, 38, 689–698, doi:10.1016/j.cemconres.2007.12.006.
17. Chen, J.; Ye, G. A Lattice Boltzmann Single Component Model for Simulation of the Autogenous Self-Healing Caused by Further Hydration in Cementitious Material at Mesoscale. *Cement and Concrete Research* 2019, 123, 105782, doi:10.1016/j.cemconres.2019.105782.
18. Chitez, A.S.; Jefferson, A.D. A Coupled Thermo-Hygro-Chemical Model for Characterising Autogenous Healing in Ordinary Cementitious Materials. *Cement and Concrete Research* 2016, 88, 184–197, doi:10.1016/j.cemconres.2016.07.002.
19. Choi, S.-G.; Wang, K.; Wen, Z.; Chu, J. Mortar Crack Repair Using Microbial Induced Calcite Precipitation Method. *Cement and Concrete Composites* 2017, 83, 209–221, doi:10.1016/j.cemconcomp.2017.07.013.
20. Choi, Y.C.; Park, B. Enhanced Autogenous Healing of Ground Granulated Blast Furnace Slag Blended Cements and Mortars. *Journal of Materials Research and Technology* 2019, 8, 3443–3452, doi:10.1016/j.jmrt.2019.06.010.
21. Cuenca, E.; Tejedor, A.; Ferrara, L. A Methodology to Assess Crack-Sealing Effectiveness of Crystalline Admixtures under Repeated Cracking-Healing Cycles. *Construction and Building Materials* 2018, 179, 619–632, doi:10.1016/j.conbuildmat.2018.05.261.
22. Da Silva, F.B.; De Belie, N.; Boon, N.; Verstraete, W. Production of Non-Axenic Ureolytic Spores for Self-Healing Concrete Applications. *Construction and Building Materials* 2015, 93, 1034–1041, doi:10.1016/j.conbuildmat.2015.05.049.
23. De Nardi, C.; Cecchi, A.; Ferrara, L.; Benedetti, A.; Cristofori, D. Effect of Age and Level of Damage on the Autogenous Healing of Lime Mortars. *Composites Part B: Engineering* 2017, 124, 144–157, doi:10.1016/j.compositesb.2017.05.041.
24. Di Luzio, G.; Ferrara, L.; Krelani, V. Numerical Modeling of Mechanical Regain Due to Self-Healing in Cement Based Composites. *Cement and Concrete Composites* 2018, 86, 190–205, doi:10.1016/j.cemconcomp.2017.11.006.
25. Dolado, J.S.; van Breugel, K. Recent Advances in Modeling for Cementitious Materials. *Cement and Concrete Research* 2011, 41, 711–726, doi:10.1016/j.cemconres.2011.03.014.



26. Dong, B.; Fang, G.; Wang, Y.; Liu, Y.; Hong, S.; Zhang, J.; Lin, S.; Xing, F. Performance Recovery Concerning the Permeability of Concrete by Means of a Microcapsule Based Self-Healing System. *Cement and Concrete Composites* 2017, 78, 84–96, doi:10.1016/j.cemconcomp.2016.12.005.
27. Dorozhkin, S.V. Biphasic, Triphasic and Multiphasic Calcium Orthophosphates. *Acta Biomaterialia* 2012, 8, 963–977, doi:10.1016/j.actbio.2011.09.003.
28. Ducasse-Lapeyrousse, J.; Gagné, R.; Lors, C.; Damidot, D. Effect of Calcium Gluconate, Calcium Lactate, and Urea on the Kinetics of Self-Healing in Mortars. *Construction and Building Materials* 2017, 157, 489–497, doi:10.1016/j.conbuildmat.2017.09.115.
29. Fan, S.; Li, X.; Li, M. The Effects of Damage and Self-Healing on Impedance Spectroscopy of Strain-Hardening Cementitious Materials. *Cement and Concrete Research* 2018, 106, 77–90, doi:10.1016/j.cemconres.2018.01.016.
30. Fang, G.; Liu, Y.; Qin, S.; Ding, W.; Zhang, J.; Hong, S.; Xing, F.; Dong, B. Visualized Tracing of Crack Self-Healing Features in Cement/Microcapsule System with X-Ray Microcomputed Tomography. *Construction and Building Materials* 2018, 179, 336–347, doi:10.1016/j.conbuildmat.2018.05.193.
31. Feiteira, J.; Gruyaert, E.; De Belie, N. Self-Healing of Moving Cracks in Concrete by Means of Encapsulated Polymer Precursors. *Construction and Building Materials* 2016, 102, 671–678, doi:10.1016/j.conbuildmat.2015.10.192.
32. Feiteira, J.; Tsangouri, E.; Gruyaert, E.; Lors, C.; Louis, G.; De Belie, N. Monitoring Crack Movement in Polymer-Based Self-Healing Concrete through Digital Image Correlation, Acoustic Emission Analysis and SEM in-Situ Loading. *Materials & Design* 2017, 115, 238–246, doi:10.1016/j.matdes.2016.11.050.
33. Feng, J.; Su, Y.; Qian, C. Coupled Effect of PP Fiber, PVA Fiber and Bacteria on Self-Healing Efficiency of Early-Age Cracks in Concrete. *Construction and Building Materials* 2019, 228, 116810, doi:10.1016/j.conbuildmat.2019.116810.
34. Ferraresi, R.; Pallosi, A.; Aprigliano, G.; Caravaggi, C.; Centola, M.; Sozzi, F.; Danzi, G.B.; Manzi, M. Angioplasty of Below-the-Elbow Arteries in Critical Hand Ischaemia. *European Journal of Vascular and Endovascular Surgery* 2012, 43, 73–80, doi:10.1016/j.ejvs.2011.10.006.
35. Galan, I.; Baldermann, A.; Kusterle, W.; Dietzel, M.; Mittermayr, F. Durability of Shotcrete for Underground Support—Review and Update. *Construction and Building Materials* 2019, 202, 465–493, doi:10.1016/j.conbuildmat.2018.12.151.
36. García Calvo, J.L.; Pérez, G.; Carballosa, P.; Erkizia, E.; Gaitero, J.J.; Guerrero, A. Development of Ultra-High Performance Concretes with Self-Healing Micro/Nano-Additions. *Construction and Building Materials* 2017, 138, 306–315, doi:10.1016/j.conbuildmat.2017.02.015.
37. García Calvo, J.L.; Pérez, G.; Carballosa, P.; Erkizia, E.; Gaitero, J.J.; Guerrero, A. 3 - The effect of nanoparticles on the self-healing capacity of high performance concrete. In *Nanotechnology in Eco-efficient Construction (Second Edition)*; Pacheco-Torgal, F., Diamanti, M.V., Nazari, A., Granqvist, C.G., Pruna, A., Amirkhania, S., Eds.; Woodhead Publishing Series in Civil and Structural Engineering; Woodhead Publishing, 2019; pp. 43–67 ISBN 978-0-08-102641-0.
38. Ghantous, R.M.; Poyet, S.; L'Hostis, V.; Tran, N.-C.; François, R. Effect of Crack Openings on Carbonation-Induced Corrosion. *Cement and Concrete Research* 2017, 95, 257–269, doi:10.1016/j.cemconres.2017.02.014.
39. Gupta, S.; Kua, H.W.; Pang, S.D. Healing Cement Mortar by Immobilization of Bacteria in Biochar: An Integrated Approach of Self-Healing and Carbon Sequestration. *Cement and Concrete Composites* 2018, 86, 238–254, doi:10.1016/j.cemconcomp.2017.11.015.
40. Gupta, S.; Pang, S.D.; Kua, H.W. Autonomous Healing in Concrete by Bio-Based Healing Agents – A Review. *Construction and Building Materials* 2017, 146, 419–428, doi:10.1016/j.conbuildmat.2017.04.111.
41. He, J.; Shi, X. Developing an Abiotic Capsule-Based Self-Healing System for Cementitious Materials: The State of Knowledge. *Construction and Building Materials* 2017, 156, 1096–1113, doi:10.1016/j.conbuildmat.2017.09.041.
42. He, Z.; Shen, A.; Guo, Y.; Lyu, Z.; Li, D.; Qin, X.; Zhao, M.; Wang, Z. Cement-Based Materials Modified with Superabsorbent Polymers: A Review. *Construction and Building Materials* 2019, 225, 569–590, doi:10.1016/j.conbuildmat.2019.07.139.

43. Hilloulin, B.; Grondin, F.; Matallah, M.; Loukili, A. Modelling of Autogenous Healing in Ultra High Performance Concrete. *Cement and Concrete Research* 2014, 61–62, 64–70, doi:10.1016/j.cemconres.2014.04.003.
44. Hilloulin, B.; Legland, J.-B.; Lys, E.; Abraham, O.; Loukili, A.; Grondin, F.; Durand, O.; Tournat, V. Monitoring of Autogenous Crack Healing in Cementitious Materials by the Nonlinear Modulation of Ultrasonic Coda Waves, 3D Microscopy and X-Ray Microtomography. *Construction and Building Materials* 2016, 123, 143–152, doi:10.1016/j.conbuildmat.2016.06.138.
45. Hoseini, M.; Bindiganavile, V.; Banthia, N. The Effect of Mechanical Stress on Permeability of Concrete: A Review. *Cement and Concrete Composites* 2009, 31, 213–220, doi:10.1016/j.cemconcomp.2009.02.003.
46. Huang, H.; Ye, G.; Qian, C.; Schlangen, E. Self-Healing in Cementitious Materials: Materials, Methods and Service Conditions. *Materials & Design* 2016, 92, 499–511, doi:10.1016/j.matdes.2015.12.091.
47. Huseien, G.F.; Shah, K.W.; Sam, A.R.M. Sustainability of Nanomaterials Based Self-Healing Concrete: An All-Inclusive Insight. *Journal of Building Engineering* 2019, 23, 155–171, doi:10.1016/j.jobbe.2019.01.032.
48. In, C.-W.; Holland, R.B.; Kim, J.-Y.; Kurtis, K.E.; Kahn, L.F.; Jacobs, L.J. Monitoring and Evaluation of Self-Healing in Concrete Using Diffuse Ultrasound. *NDT & E International* 2013, 57, 36–44, doi:10.1016/j.ndteint.2013.03.005.
49. Ismail, M.; Toumi, A.; François, R.; Gagné, R. Effect of Crack Opening on the Local Diffusion of Chloride in Cracked Mortar Samples. *Cement and Concrete Research* 2008, 38, 1106–1111, doi:10.1016/j.cemconres.2008.03.009.
50. Ismail, M.; Toumi, A.; François, R.; Gagné, R. Effect of Crack Opening on the Local Diffusion of Chloride in Cracked Mortar Samples. *Cement and Concrete Research* 2008, 38, 1106–1111, doi:10.1016/j.cemconres.2008.03.009.
51. Jiang, J.; Zheng, X.; Wu, S.; Liu, Z.; Zheng, Q. Nondestructive Experimental Characterization and Numerical Simulation on Self-Healing and Chloride Ion Transport in Cracked Ultra-High Performance Concrete. *Construction and Building Materials* 2019, 198, 696–709, doi:10.1016/j.conbuildmat.2018.11.054.
52. Jiang, J.; Zheng, X.; Wu, S.; Liu, Z.; Zheng, Q. Nondestructive Experimental Characterization and Numerical Simulation on Self-Healing and Chloride Ion Transport in Cracked Ultra-High Performance Concrete. *Construction and Building Materials* 2019, 198, 696–709, doi:10.1016/j.conbuildmat.2018.11.054.
53. Kalhori, H.; Bagherpour, R. Application of Carbonate Precipitating Bacteria for Improving Properties and Repairing Cracks of Shotcrete. *Construction and Building Materials* 2017, 148, 249–260, doi:10.1016/j.conbuildmat.2017.05.074.
54. Kewalramani, M.A.; Mohamed, O.A.; Syed, Z.I. Engineered Cementitious Composites for Modern Civil Engineering Structures in Hot Arid Coastal Climatic Conditions. *Procedia Engineering* 2017, 180, 767–774, doi:10.1016/j.proeng.2017.04.237.
55. Kua, H.W.; Gupta, S.; Aday, A.N.; Srubar, W.V. Biochar-Immobilized Bacteria and Superabsorbent Polymers Enable Self-Healing of Fiber-Reinforced Concrete after Multiple Damage Cycles. *Cement and Concrete Composites* 2019, 100, 35–52, doi:10.1016/j.cemconcomp.2019.03.017.
56. Lepech, M.D.; Li, V.C. Water Permeability of Engineered Cementitious Composites. *Cement and Concrete Composites* 2009, 31, 744–753, doi:10.1016/j.cemconcomp.2009.07.002.
57. Lepech, M.D.; Li, V.C. Water Permeability of Engineered Cementitious Composites. *Cement and Concrete Composites* 2009, 31, 744–753, doi:10.1016/j.cemconcomp.2009.07.002.
58. Li, Q.; Liu, Z.; Chen, W.; Yuan, B.; Liu, X.; Chen, W. A Novel Bio-Inspired Bone-Mimic Self-Healing Cement Paste Based on Hydroxyapatite Formation. *Cement and Concrete Composites* 2019, 104, 103357, doi:10.1016/j.cemconcomp.2019.103357.
59. Li, V.C. High-Performance and Multifunctional Cement-Based Composite Material. *Engineering* 2019, 5, 250–260, doi:10.1016/j.eng.2018.11.031.
60. Liu, K.; Shui, Z.; Sun, T.; Ling, G.; Li, X.; Cheng, S. Effects of Combined Expansive Agents and Supplementary Cementitious Materials on the Mechanical Properties, Shrinkage and Chloride Penetration of Self-Compacting Concrete. *Construction and Building Materials* 2019, 211, 120–129, doi:10.1016/j.conbuildmat.2019.03.143.

61. Lors, C.; Ducasse-Lapeyresse, J.; Gagné, R.; Damidot, D. Microbiologically Induced Calcium Carbonate Precipitation to Repair Microcracks Remaining after Autogenous Healing of Mortars. *Construction and Building Materials* 2017, 141, 461–469, doi:10.1016/j.conbuildmat.2017.03.026.
62. Luo, J.; Chen, X.; Crump, J.; Zhou, H.; Davies, D.G.; Zhou, G.; Zhang, N.; Jin, C. Interactions of Fungi with Concrete: Significant Importance for Bio-Based Self-Healing Concrete. *Construction and Building Materials* 2018, 164, 275–285, doi:10.1016/j.conbuildmat.2017.12.233.
63. Ma, H.; Zhang, Z.; Ding, B.; Tu, X. Investigation on the Adhesive Characteristics of Engineered Cementitious Composites (ECC) to Steel Bridge Deck. *Construction and Building Materials* 2018, 191, 679–691, doi:10.1016/j.conbuildmat.2018.10.056.
64. Maes, M.; Snoeck, D.; De Belie, N. Chloride Penetration in Cracked Mortar and the Influence of Autogenous Crack Healing. *Construction and Building Materials* 2016, 115, 114–124, doi:10.1016/j.conbuildmat.2016.03.180.
65. Maes, M.; Van Tittelboom, K.; De Belie, N. The Efficiency of Self-Healing Cementitious Materials by Means of Encapsulated Polyurethane in Chloride Containing Environments. *Construction and Building Materials* 2014, 71, 528–537, doi:10.1016/j.conbuildmat.2014.08.053.
66. Mamun, M.; Bindiganavile, V. Sulphate Resistance of Fibre Reinforced Cement-Based Foams. *Construction and Building Materials* 2011, 25, 3427–3442, doi:10.1016/j.conbuildmat.2011.03.034.
67. Mangadlao, J.D.; Cao, P.; Advincula, R.C. Smart Cements and Cement Additives for Oil and Gas Operations. *Journal of Petroleum Science and Engineering* 2015, 129, 63–76, doi:10.1016/j.petrol.2015.02.009.
68. Mechtcherine, V. Towards a Durability Framework for Structural Elements and Structures Made of or Strengthened with High-Performance Fibre-Reinforced Composites. *Construction and Building Materials* 2012, 31, 94–104, doi:10.1016/j.conbuildmat.2011.12.072.
69. Mechtcherine, V. Towards a Durability Framework for Structural Elements and Structures Made of or Strengthened with High-Performance Fibre-Reinforced Composites. *Construction and Building Materials* 2012, 31, 94–104, doi:10.1016/j.conbuildmat.2011.12.072.
70. Milla, J.; Hassan, M.M.; Rupnow, T.; Daly, W.H. Measuring the Crack-Repair Efficiency of Steel Fiber Reinforced Concrete Beams with Microencapsulated Calcium Nitrate. *Construction and Building Materials* 2019, 201, 526–538, doi:10.1016/j.conbuildmat.2018.12.193.
71. Mondal, S.; Ghosh, A. (Dey) Investigation into the Optimal Bacterial Concentration for Compressive Strength Enhancement of Microbial Concrete. *Construction and Building Materials* 2018, 183, 202–214, doi:10.1016/j.conbuildmat.2018.06.176.
72. Morin, V.; Cohen Tenoudji, F.; Feylessoufi, A.; Richard, P. Superplasticizer Effects on Setting and Structuration Mechanisms of Ultrahigh-Performance Concrete. *Cement and Concrete Research* 2001, 31, 63–71, doi:10.1016/S0008-8846(00)00428-2.
73. Mors, R.M.; Jonkers, H.M. Feasibility of Lactate Derivative Based Agent as Additive for Concrete for Regain of Crack Water Tightness by Bacterial Metabolism. *Industrial Crops and Products* 2017, 106, 97–104, doi:10.1016/j.indcrop.2016.10.037.
74. Muhammad, N.Z.; Shafaghat, A.; Keyvanfar, A.; Abd. Majid, M.Z.; Ghoshal, S.K.; Mohammadyan Yasouj, S.E.; Ganiyu, A.A.; Samadi Kouchaksaraei, M.; Kamyab, H.; Taheri, M.M.; et al. Tests and Methods of Evaluating the Self-Healing Efficiency of Concrete: A Review. *Construction and Building Materials* 2016, 112, 1123–1132, doi:10.1016/j.conbuildmat.2016.03.017.
75. Nguyễn, H.H.; Choi, J.-I.; Kim, H.-K.; Lee, B.Y. Effects of the Type of Activator on the Self-Healing Ability of Fiber-Reinforced Alkali-Activated Slag-Based Composites at an Early Age. *Construction and Building Materials* 2019, 224, 980–994, doi:10.1016/j.conbuildmat.2019.07.113.
76. Nguyen, T.H.; Ghorbel, E.; Fares, H.; Cousture, A. Bacterial Self-Healing of Concrete and Durability Assessment. *Cement and Concrete Composites* 2019, 104, 103340, doi:10.1016/j.cemconcomp.2019.103340.

77. Oucif, C.; Voyiadjis, G.Z.; Rabczuk, T. Modeling of Damage-Healing and Nonlinear Self-Healing Concrete Behavior: Application to Coupled and Uncoupled Self-Healing Mechanisms. *Theoretical and Applied Fracture Mechanics* 2018, 96, 216–230, doi:10.1016/j.tafmec.2018.04.010.
78. Pal Kaur, N.; Kumar Shah, J.; Majhi, S.; Mukherjee, A. Healing and Simultaneous Ultrasonic Monitoring of Cracks in Concrete. *Materials Today Communications* 2019, 18, 87–99, doi:10.1016/j.mtcomm.2018.10.022.
79. Palin, D.; Wiktor, V.; Jonkers, H.M. Autogenous Healing of Marine Exposed Concrete: Characterization and Quantification through Visual Crack Closure. *Cement and Concrete Research* 2015, 73, 17–24, doi:10.1016/j.cemconres.2015.02.021.
80. Pang, B.; Zhou, Z.; Hou, P.; Du, P.; Zhang, L.; Xu, H. Autogenous and Engineered Healing Mechanisms of Carbonated Steel Slag Aggregate in Concrete. *Construction and Building Materials* 2016, 107, 191–202, doi:10.1016/j.conbuildmat.2015.12.191.
81. Phung, Q.T.; Maes, N.; De Schutter, G.; Jacques, D.; Ye, G. Determination of Water Permeability of Cementitious Materials Using a Controlled Constant Flow Method. *Construction and Building Materials* 2013, 47, 1488–1496, doi:10.1016/j.conbuildmat.2013.06.074.
82. Qiu, J.; He, S.; Yang, E.-H. Autogenous Healing and Its Enhancement of Interface between Micro Polymeric Fiber and Hydraulic Cement Matrix. *Cement and Concrete Research* 2019, 124, 105830, doi:10.1016/j.cemconres.2019.105830.
83. Qureshi, T.; Kanellopoulos, A.; Al-Tabbaa, A. Autogenous Self-Healing of Cement with Expansive Minerals-I: Impact in Early Age Crack Healing. *Construction and Building Materials* 2018, 192, 768–784, doi:10.1016/j.conbuildmat.2018.10.143.
84. Qureshi, T.; Kanellopoulos, A.; Al-Tabbaa, A. Autogenous Self-Healing of Cement with Expansive Minerals-II: Impact of Age and the Role of Optimised Expansive Minerals in Healing Performance. *Construction and Building Materials* 2019, 194, 266–275, doi:10.1016/j.conbuildmat.2018.11.027.
85. Qureshi, T.S.; Kanellopoulos, A.; Al-Tabbaa, A. Encapsulation of Expansive Powder Minerals within a Concentric Glass Capsule System for Self-Healing Concrete. *Construction and Building Materials* 2016, 121, 629–643, doi:10.1016/j.conbuildmat.2016.06.030.
86. Rahal, S.; Sellier, A. Influence of Crack Reclosure on Concrete Permeability. *Theoretical and Applied Fracture Mechanics* 2019, 100, 65–77, doi:10.1016/j.tafmec.2018.11.010.
87. Rodríguez, C.R.; Figueiredo, S.C.; Deprez, M.; Snoeck, D.; Schlangen, E.; Šavija, B. Numerical Investigation of Crack Self-Sealing in Cement-Based Composites with Superabsorbent Polymers. *Cement and Concrete Composites* 2019, 104, 103395, doi:10.1016/j.cemconcomp.2019.103395.
88. Rossi, P.; Tailhan, J.-L.; Le Maou, F.; Gaillet, L.; Martin, E. Basic Creep Behavior of Concretes Investigation of the Physical Mechanisms by Using Acoustic Emission. *Cement and Concrete Research* 2012, 42, 61–73, doi:10.1016/j.cemconres.2011.07.011.
89. Şahmaran, M.; Keskin, S.B.; Ozerkan, G.; Yaman, I.O. Self-Healing of Mechanically-Loaded Self Consolidating Concretes with High Volumes of Fly Ash. *Cement and Concrete Composites* 2008, 30, 872–879, doi:10.1016/j.cemconcomp.2008.07.001.
90. Şahmaran, M.; Keskin, S.B.; Ozerkan, G.; Yaman, I.O. Self-Healing of Mechanically-Loaded Self Consolidating Concretes with High Volumes of Fly Ash. *Cement and Concrete Composites* 2008, 30, 872–879, doi:10.1016/j.cemconcomp.2008.07.001.
91. Şahmaran, M.; Lachemi, M.; Hossain, K.M.A.; Li, V.C. Internal Curing of Engineered Cementitious Composites for Prevention of Early Age Autogenous Shrinkage Cracking. *Cement and Concrete Research* 2009, 39, 893–901, doi:10.1016/j.cemconres.2009.07.006.
92. Şahmaran, M.; Li, V.C. Durability of Mechanically Loaded Engineered Cementitious Composites under Highly Alkaline Environments. *Cement and Concrete Composites* 2008, 30, 72–81, doi:10.1016/j.cemconcomp.2007.09.004.

93. Sahmaran, M.; Yildirim, G.; Erdem, T.K. Self-Healing Capability of Cementitious Composites Incorporating Different Supplementary Cementitious Materials. *Cement and Concrete Composites* 2013, 35, 89–101, doi:10.1016/j.cemconcomp.2012.08.013.
94. Sakulich, A.R. Reinforced Geopolymer Composites for Enhanced Material Greenness and Durability. *Sustainable Cities and Society* 2011, 1, 195–210, doi:10.1016/j.scs.2011.07.009.
95. Sánchez, M.; Faria, P.; Ferrara, L.; Horszczaruk, E.; Jonkers, H.M.; Kwiecień, A.; Mosa, J.; Peled, A.; Pereira, A.S.; Snoeck, D.; et al. External Treatments for the Preventive Repair of Existing Constructions: A Review. *Construction and Building Materials* 2018, 193, 435–452, doi:10.1016/j.conbuildmat.2018.10.173.
96. Schlangen, E.; Sangadji, S. Addressing Infrastructure Durability and Sustainability by Self Healing Mechanisms - Recent Advances in Self Healing Concrete and Asphalt. *Procedia Engineering* 2013, 54, 39–57, doi:10.1016/j.proeng.2013.03.005.
97. Schreiberová, H.; Bílý, P.; Fládr, J.; Šeps, K.; Chylík, R.; Trtík, T. Impact of the Self-Healing Agent Composition on Material Characteristics of Bio-Based Self-Healing Concrete. *Case Studies in Construction Materials* 2019, 11, e00250, doi:10.1016/j.cscm.2019.e00250.
98. Shaheen, N.; Khushnood, R.A.; Khaliq, W.; Murtaza, H.; Iqbal, R.; Khan, M.H. Synthesis and Characterization of Bio-Immobilized Nano/Micro Inert and Reactive Additives for Feasibility Investigation in Self-Healing Concrete. *Construction and Building Materials* 2019, 226, 492–506, doi:10.1016/j.conbuildmat.2019.07.202.
99. Sherir, M.A.A.; Hossain, K.M.A.; Lachemi, M. Fresh State, Mechanical & Durability Properties of Strain Hardening Cementitious Composite Produced with Locally Available Aggregates and High Volume of Fly Ash. *Construction and Building Materials* 2018, 189, 253–264, doi:10.1016/j.conbuildmat.2018.08.204.
100. Sidiq, A.; Gravina, R.; Giustozzi, F. Is Concrete Healing Really Efficient? A Review. *Construction and Building Materials* 2019, 205, 257–273, doi:10.1016/j.conbuildmat.2019.02.002.
101. Sisomphon, K.; Çopuroğlu, O.; Fraaij, A.L.A. Durability of Blast-Furnace Slag Mortars Subjected to Sodium Mono-fluorophosphate Application. *Construction and Building Materials* 2011, 25, 823–828, doi:10.1016/j.conbuildmat.2009.09.010.
102. Snoeck, D.; De Belie, N. From Straw in Bricks to Modern Use of Microfibers in Cementitious Composites for Improved Autogenous Healing – A Review. *Construction and Building Materials* 2015, 95, 774–787, doi:10.1016/j.conbuildmat.2015.07.018.
103. Snoeck, D.; De Schryver, T.; De Belie, N. Enhanced Impact Energy Absorption in Self-Healing Strain-Hardening Cementitious Materials with Superabsorbent Polymers. *Construction and Building Materials* 2018, 191, 13–22, doi:10.1016/j.conbuildmat.2018.10.015.
104. Snoeck, D.; Dewanckele, J.; Cnudde, V.; De Belie, N. X-Ray Computed Microtomography to Study Autogenous Healing of Cementitious Materials Promoted by Superabsorbent Polymers. *Cement and Concrete Composites* 2016, 65, 83–93, doi:10.1016/j.cemconcomp.2015.10.016.
105. Snoeck, D.; Van den Heede, P.; Van Mullem, T.; De Belie, N. Water Penetration through Cracks in Self-Healing Cementitious Materials with Superabsorbent Polymers Studied by Neutron Radiography. *Cement and Concrete Research* 2018, 113, 86–98, doi:10.1016/j.cemconres.2018.07.002.
106. Somarathna, H.M.C.C.; Raman, S.N.; Mohotti, D.; Mutalib, A.A.; Badri, K.H. The Use of Polyurethane for Structural and Infrastructural Engineering Applications: A State-of-the-Art Review. *Construction and Building Materials* 2018, 190, 995–1014, doi:10.1016/j.conbuildmat.2018.09.166.
107. Souza, L.; Souza, L.; Silva, F. Autogenous Healing Capability of Natural Curauá Textile Reinforced Concrete. *Procedia Engineering* 2017, 200, 290–294, doi:10.1016/j.proeng.2017.07.041.
108. Su, Y.; Feng, J.; Jin, P.; Qian, C. Influence of Bacterial Self-Healing Agent on Early Age Performance of Cement-Based Materials. *Construction and Building Materials* 2019, 218, 224–234, doi:10.1016/j.conbuildmat.2019.05.077.

109. Tam, C.M.; Tam, V.W.Y.; Ng, K.M. Assessing Drying Shrinkage and Water Permeability of Reactive Powder Concrete Produced in Hong Kong. *Construction and Building Materials* 2012, 26, 79–89, doi:10.1016/j.conbuildmat.2011.05.006.
110. Tang, W.; Kardani, O.; Cui, H. Robust Evaluation of Self-Healing Efficiency in Cementitious Materials – A Review. *Construction and Building Materials* 2015, 81, 233–247, doi:10.1016/j.conbuildmat.2015.02.054.
111. Tsangouri, E.; Gilabert, F.A.; De Belie, N.; Van Hemelrijck, D.; Zhu, X.; Aggelis, D.G. Concrete Fracture Toughness Increase by Embedding Self-Healing Capsules Using an Integrated Experimental Approach. *Construction and Building Materials* 2019, 218, 424–433, doi:10.1016/j.conbuildmat.2019.05.138.
112. Van den Heede, P.; Maes, M.; De Belie, N. Influence of Active Crack Width Control on the Chloride Penetration Resistance and Global Warming Potential of Slabs Made with Fly Ash+silica Fume Concrete. *Construction and Building Materials* 2014, 67, 74–80, doi:10.1016/j.conbuildmat.2013.10.032.
113. Van den Heede, P.; Mignon, A.; Habert, G.; De Belie, N. Cradle-to-Gate Life Cycle Assessment of Self-Healing Engineered Cementitious Composite with in-House Developed (Semi-)Synthetic Superabsorbent Polymers. *Cement and Concrete Composites* 2018, 94, 166–180, doi:10.1016/j.cemconcomp.2018.08.017.
114. Van den Heede, P.; Mignon, A.; Habert, G.; De Belie, N. Cradle-to-Gate Life Cycle Assessment of Self-Healing Engineered Cementitious Composite with in-House Developed (Semi-)Synthetic Superabsorbent Polymers. *Cement and Concrete Composites* 2018, 94, 166–180, doi:10.1016/j.cemconcomp.2018.08.017.
115. Van Mullem, T.; Gruyaert, E.; Debbaut, B.; Caspeele, R.; De Belie, N. Novel Active Crack Width Control Technique to Reduce the Variation on Water Permeability Results for Self-Healing Concrete. *Construction and Building Materials* 2019, 203, 541–551, doi:10.1016/j.conbuildmat.2019.01.105.
116. Vijay, K.; Murmu, M.; Deo, S.V. Bacteria Based Self Healing Concrete – A Review. *Construction and Building Materials* 2017, 152, 1008–1014, doi:10.1016/j.conbuildmat.2017.07.040.
117. Wang, J.; Dewanckele, J.; Cnudde, V.; Van Vlierberghe, S.; Verstraete, W.; De Belie, N. X-Ray Computed Tomography Proof of Bacterial-Based Self-Healing in Concrete. *Cement and Concrete Composites* 2014, 53, 289–304, doi:10.1016/j.cemconcomp.2014.07.014.
118. Wang, J.; Mignon, A.; Trensou, G.; Van Vlierberghe, S.; Boon, N.; De Belie, N. A Chitosan Based PH-Responsive Hydrogel for Encapsulation of Bacteria for Self-Sealing Concrete. *Cement and Concrete Composites* 2018, 93, 309–322, doi:10.1016/j.cemconcomp.2018.08.007.
119. Wang, J.Y.; Snoeck, D.; Van Vlierberghe, S.; Verstraete, W.; De Belie, N. Application of Hydrogel Encapsulated Carbonate Precipitating Bacteria for Approaching a Realistic Self-Healing in Concrete. *Construction and Building Materials* 2014, 68, 110–119, doi:10.1016/j.conbuildmat.2014.06.018.
120. Wang, J.Y.; Soens, H.; Verstraete, W.; De Belie, N. Self-Healing Concrete by Use of Microencapsulated Bacterial Spores. *Cement and Concrete Research* 2014, 56, 139–152, doi:10.1016/j.cemconres.2013.11.009.
121. Wang, Y.; Geng, Y.; Ranzi, G.; Zhang, S. Time-Dependent Behaviour of Expansive Concrete-Filled Steel Tubular Columns. *Journal of Constructional Steel Research* 2011, 67, 471–483, doi:10.1016/j.jcsr.2010.09.007.
122. Wu, M.; Hu, X.; Hu, Z.; Zhao, Y.; Cheng, W.; Lu, W. Two-Component Polyurethane Healing System: Effect of Different Accelerators and Capsules on the Healing Efficiency of Dynamic Concrete Cracks. *Construction and Building Materials* 2019, 227, 116700, doi:10.1016/j.conbuildmat.2019.116700.
123. Wu, M.; Hu, X.; Zhang, Q.; Xue, D.; Zhao, Y. Growth Environment Optimization for Inducing Bacterial Mineralization and Its Application in Concrete Healing. *Construction and Building Materials* 2019, 209, 631–643, doi:10.1016/j.conbuildmat.2019.03.181.
124. Wu, M.; Johannesson, B.; Geiker, M. A Review: Self-Healing in Cementitious Materials and Engineered Cementitious Composite as a Self-Healing Material. *Construction and Building Materials* 2012, 28, 571–583, doi:10.1016/j.conbuildmat.2011.08.086.

125. Wu, Z.; Wong, H.S.; Buenfeld, N.R. Influence of Drying-Induced Microcracking and Related Size Effects on Mass Transport Properties of Concrete. *Cement and Concrete Research* 2015, 68, 35–48, doi:10.1016/j.cemconres.2014.10.018.
126. Xu, J.; Yao, W. Multiscale Mechanical Quantification of Self-Healing Concrete Incorporating Non-Ureolytic Bacteria-Based Healing Agent. *Cement and Concrete Research* 2014, 64, 1–10, doi:10.1016/j.cemconres.2014.06.003.
127. Yazıcı, H. The Effect of Silica Fume and High-Volume Class C Fly Ash on Mechanical Properties, Chloride Penetration and Freeze–Thaw Resistance of Self-Compacting Concrete. *Construction and Building Materials* 2008, 22, 456–462, doi:10.1016/j.conbuildmat.2007.01.002.
128. Yu, J.; Li, H.; Leung, C.K.Y.; Lin, X.; Lam, J.Y.K.; Sham, I.M.L.; Shih, K. Matrix Design for Waterproof Engineered Cementitious Composites (ECCs). *Construction and Building Materials* 2017, 139, 438–446, doi:10.1016/j.conbuildmat.2017.02.076.
129. Zemmann, M.; Herrmann, N.; Dehn, F. Calcite Formation on Steamed Concrete Surfaces and Its Potential for Sealing Cracks. *Construction and Building Materials* 2019, 203, 1–8, doi:10.1016/j.conbuildmat.2019.01.091.
130. Zhang, J.; Liu, Y.; Feng, T.; Zhou, M.; Zhao, L.; Zhou, A.; Li, Z. Immobilizing Bacteria in Expanded Perlite for the Crack Self-Healing in Concrete. *Construction and Building Materials* 2017, 148, 610–617, doi:10.1016/j.conbuildmat.2017.05.021.
131. Zhang, J.; Zhao, C.; Zhou, A.; Yang, C.; Zhao, L.; Li, Z. Aragonite Formation Induced by Open Cultures of Microbial Consortia to Heal Cracks in Concrete: Insights into Healing Mechanisms and Crystal Polymorphs. *Construction and Building Materials* 2019, 224, 815–822, doi:10.1016/j.conbuildmat.2019.07.129.
132. Zhang, P.; Wittmann, F.H.; Lura, P.; Müller, H.S.; Han, S.; Zhao, T. Application of Neutron Imaging to Investigate Fundamental Aspects of Durability of Cement-Based Materials: A Review. *Cement and Concrete Research* 2018, 108, 152–166, doi:10.1016/j.cemconres.2018.03.003.
133. Zhang, Z.; Ding, Y.; Qian, S. Influence of Bacterial Incorporation on Mechanical Properties of Engineered Cementitious Composites (ECC). *Construction and Building Materials* 2019, 196, 195–203, doi:10.1016/j.conbuildmat.2018.11.089.
134. Zhu, Y.; Yang, Y.; Yao, Y. Autogenous Self-Healing of Engineered Cementitious Composites under Freeze–Thaw Cycles. *Construction and Building Materials* 2012, 34, 522–530, doi:10.1016/j.conbuildmat.2012.03.001.
135. Ziari, A.; Kianoush, M.R. Investigation of Direct Tension Cracking and Leakage in RC Elements. *Engineering Structures* 2009, 31, 466–474, doi:10.1016/j.engstruct.2008.09.011.
136. Ziari, A.; Reza Kianoush, M. Investigation of Flexural Cracking and Leakage in RC Liquid Containing Structures. *Engineering Structures* 2009, 31, 1056–1067, doi:10.1016/j.engstruct.2008.12.019.
